# Supplementary material
Source: PubMed Central journal article supplement (PMC1304359)
Supplement: biophysj_87_1_375__1.pdf [file biophysj_87_1_375__1.pdf]

**Supplemental Table** Observed vicinal ( $J_{\alpha\beta1}$  and  $J_{\alpha\beta2}$ ) and geminal ( $J_{\beta1\beta2}$ )  $^1\text{H}$ - $^1\text{H}$  coupling constants among  $\alpha$ - and  $\beta$ -protons of D-Phe and Asp residues in 1 mM achatin-I in methanol- $d_4$  solution.

| Ionization State                                                                                                                  | $J$                | D-Phe        | Asp          |
|-----------------------------------------------------------------------------------------------------------------------------------|--------------------|--------------|--------------|
| ( $\alpha$ -ND <sub>3</sub> <sup>+</sup> ,<br>$\alpha$ -CO <sub>2</sub> <sup>-</sup> ,<br>$\beta$ -CO <sub>2</sub> <sup>-</sup> ) | $J_{\alpha\beta1}$ | 8.21 ± 0.02  | 5.48 ± 0.01  |
|                                                                                                                                   | $J_{\alpha\beta2}$ | 7.35 ± 0.03  | 4.97 ± 0.01  |
|                                                                                                                                   | $J_{\beta1\beta2}$ | 13.50 ± 0.02 | 16.10 ± 0.02 |
